# Supplementary material for: Characterization of new, efficient Mycobacterium tuberculosis topoisomerase-I inhibitors and their interaction with human ABC multidrug transporters
Source: PLOS journal article supplement (doi:10.1371/journal.pone.0202749), 2018-09-05

**S3 Fig. Representative pictures for DNA relaxation assay results presented in Table 2.**

Inhibition of MtTopo-I by the investigated compounds was measured by DNA relaxation assays by gradually refining the concentrations required for complete inhibition of purified MtTopo-I. Bands of relaxed and supercoiled DNA were visualized on agarose gels as described in the Methods section. Norclomipramine (N; 0.1  $\mu$ M) was used as a positive control for inhibition. DMSO (2.5%) was used in all the reactions as solvent control (S). C; supercoiled pUC18 control, (0) non-inhibited MtTopo-I control. In the representative pictures compounds examined in this study are indicated by code numbers. Asterisks label positive hits in the screen sets.

**Initial screening at 100  $\mu$ M**

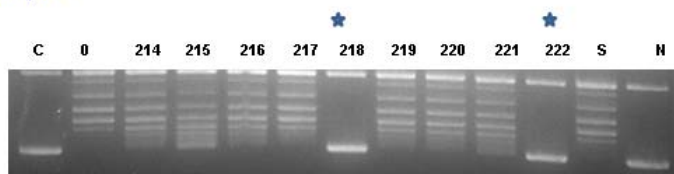

**Second screening at 10  $\mu$ M**

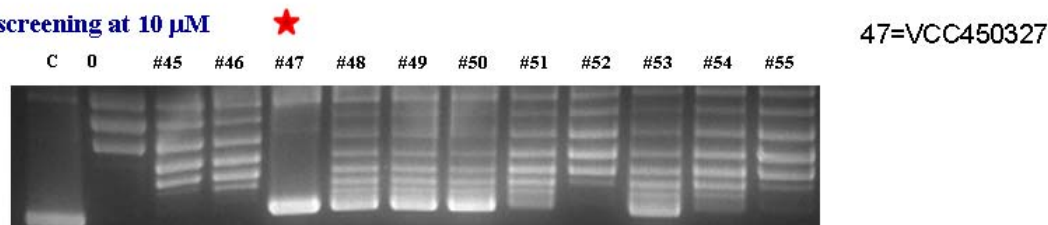

**Third screening at 0.1, 1, 2.5, 5, and 10  $\mu$ M**

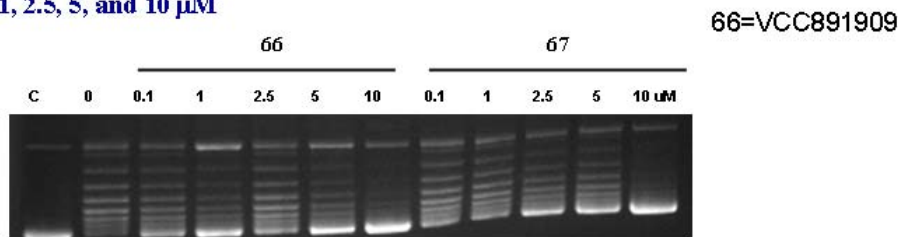

Supplement: S3 (10.1371/journal.pone.0202749.s003) [file journal.pone.0202749.s003]
